# Supplementary material
Source: Springer Nature journal article supplement (https://www.springermedizin.de/resource/supplementary/12967_2014_2113_MOESM16_ESM.pdf/9575066)
Supplement: MOESM16 [file 9575066]

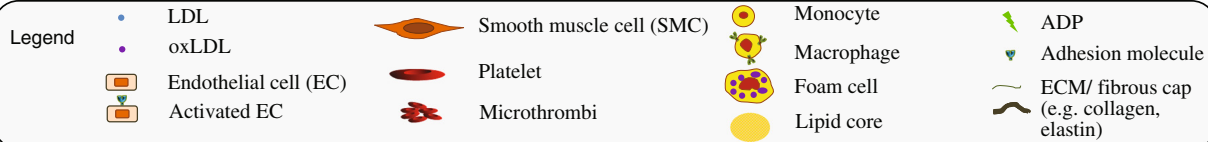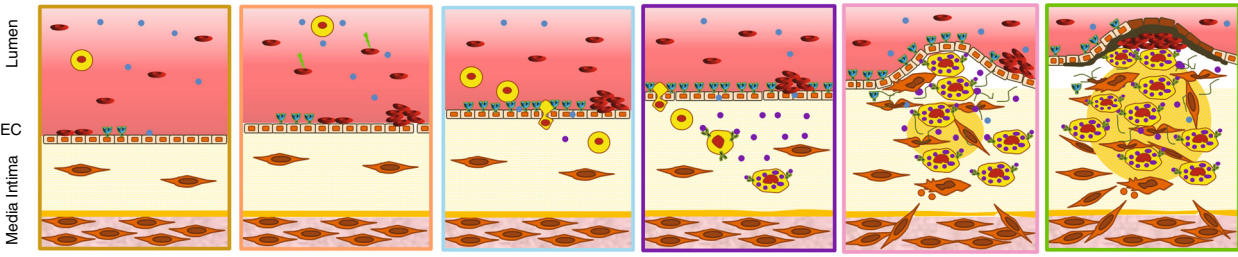

*EC Activation*

*Platelet Activation*

*EC-Monocyte Interaction*

*Foam Cell Formation*

*SMC Activation*

*Plaque Destabilization*

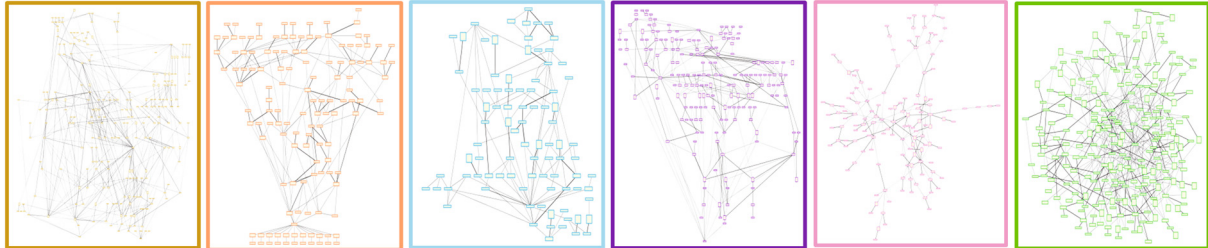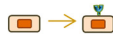

246 nodes  
156 hyps  
407 edges  
1164 statements

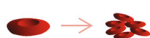

134 nodes  
59 hyps  
179 edges  
385 statements

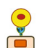

86 nodes  
30 hyps  
112 edges  
112 statements

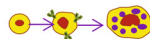

192 nodes  
118 hyps  
285 edges  
577 statements

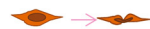

137 nodes  
87 hyps  
179 edges  
511 statements

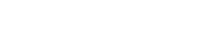

246 nodes  
101 hyps  
494 edges  
956 statements
